# Supplementary material
Source: MDPI journal article supplement (https://www.mdpi.com/2379-139X/8/5/184)
Supplement: s1 [file s1]

## Supplementary Materials

**Table S1.** KRAS gene: values of the 56 texture parameters. No significant parameters were found.

| Texture parameter                      | Median (interquartile range)  |                              | <i>p</i> |
|----------------------------------------|-------------------------------|------------------------------|----------|
|                                        | Wild-type KRAS (group 0)      | Mutated KRAS (group 1)       |          |
| CONVENTIONAL HU ExcessKurtosis         | 0.87 (0.33 to 1.39)           | 1.03 (0.51 to 1.56)          | 0.47     |
| CONVENTIONAL HU Kurtosis               | 3.87 (3.33 to 4.39)           | 4.03 (3.51 to 4.56)          | 0.47     |
| CONVENTIONAL HU max                    | 159.74 (147.35 to 182.26)     | 167.4 (154.64 to 175.66)     | 0.68     |
| CONVENTIONAL HU mean                   | 74.78 (63.82 to 82.71)        | 73.43 (62.15 to 81.17)       | 0.76     |
| CONVENTIONAL HU min                    | −60.28 (−85.99 to −41.77)     | −87.4 (−107.56 to −39.83)    | 0.47     |
| CONVENTIONAL HU Q1                     | 59.56 (47.66 to 68.41)        | 59.9 (47.21 to 67.17)        | 0.95     |
| CONVENTIONAL HU Q2                     | 75.37 (65.37 to 85.14)        | 75.67 (64.6 to 83.95)        | 0.95     |
| CONVENTIONAL HU Q3                     | 89.73 (81.7 to 99.76)         | 89.44 (82.76 to 99.95)       | 0.84     |
| CONVENTIONAL HU Skewness               | −0.44 (−0.61 to −0.17)        | −0.48 (−0.72 to −0.27)       | 0.42     |
| CONVENTIONAL HU std                    | 24.58 (22.6 to 27.09)         | 25 (23.05 to 28.36)          | 0.79     |
| DISCRETIZED AUC CSH                    | 1079.77 (1068.78 to 1087.67)  | 1078.45 (1067.17 to 1086.21) | 0.74     |
| DISCRETIZED HISTO Energy [=Uniformity] | 0.12 (0.11 to 0.13)           | 0.12 (0.11 to 0.13)          | 0.84     |
| DISCRETIZED HISTO Entropy log2         | 3.33 (3.19 to 3.47)           | 3.33 (3.22 to 3.48)          | 0.91     |
| DISCRETIZED HISTO Entropy log10        | 1 (0.96 to 1.04)              | 1 (0.97 to 1.05)             | 0.91     |
| DISCRETIZED HU ExcessKurtosis          | 0.85 (0.32 to 1.35)           | 1.02 (0.48 to 1.54)          | 0.44     |
| DISCRETIZED HU Kurtosis                | 3.85 (3.32 to 4.35)           | 4.02 (3.48 to 4.54)          | 0.44     |
| DISCRETIZED HU max                     | 116 (115 to 119)              | 117 (116 to 118)             | 0.67     |
| DISCRETIZED HU mean                    | 107.98 (106.88 to 108.77)     | 107.84 (106.72 to 108.62)    | 0.74     |
| DISCRETIZED HU min                     | 94 (91.75 to 96.25)           | 91.5 (90 to 97)              | 0.47     |
| DISCRETIZED HU Q1                      | 106 (105 to 107)              | 106 (105 to 107)             | 0.95     |
| DISCRETIZED HU Q2                      | 108 (107 to 109)              | 108 (107 to 109)             | 0.92     |
| DISCRETIZED HU Q3                      | 109 (109 to 110)              | 109.5 (109 to 110)           | 0.83     |
| DISCRETIZED HU Skewness                | −0.44 (−0.6 to −0.16)         | −0.47 (−0.7 to −0.26)        | 0.46     |
| DISCRETIZED HU std                     | 2.48 (2.28 to 2.72)           | 2.51 (2.32 to 2.85)          | 0.79     |
| GLCM Contrast [=Variance]              | 6.57 (5.54 to 8)              | 6.64 (6.14 to 7.73)          | 0.74     |
| GLCM Correlation                       | 0.39 (0.34 to 0.44)           | 0.37 (0.34 to 0.47)          | 0.66     |
| GLCM Dissimilarity                     | 1.98 (1.79 to 2.17)           | 1.94 (1.91 to 2.13)          | 0.78     |
| GLCM Energy [=AngularSecondMoment]     | 0.017 (0.014 to 0.021)        | 0.018 (0.015 to 0.021)       | 0.6      |
| GLCM Entropy log2 [=JointEntropy]      | 6.4 (6.11 to 6.65)            | 6.34 (6.18 to 6.52)          | 0.95     |
| GLCM Entropy log10                     | 1.93 (1.84 to 2)              | 1.91 (1.86 to 1.96)          | 0.95     |
| GLCM Homogeneity [=InverseDifference]  | 0.46 (0.44 to 0.48)           | 0.46 (0.44 to 0.47)          | 0.9      |
| GLRLM GLNU                             | 667.57 (474.06 to 1504.18)    | 1153.88 (327.3 to 1710.11)   | 0.73     |
| GLRLM HGRE                             | 1.16E+4 (1.14E+4 to 1.18E+4)  | 1.16E+4 (1.13E+4 to 1.17E+4) | 0.74     |
| GLRLM LGRE                             | 8.6E-5 (8.5E-5 to 8.8E-5)     | 8.6E-5 (8.5E-5 to 8.8E-5)    | 0.68     |
| GLRLM LRE                              | 1.53 (1.48 to 1.59)           | 1.53 (1.46 to 1.55)          | 0.79     |
| GLRLM LRHGE                            | 1.76E+4 (1.72E+4 to 1.87E+4)  | 1.78E+4 (1.71E+4 to 1.81E+4) | 0.78     |
| GLRLM LRLGE                            | 0.00013 (0.00013 to 0.00014)  | 0.00013 (0.00013 to 0.00014) | 0.95     |
| GLRLM RLNU                             | 4661.98 (3227.46 to 11351.41) | 6679.19 (2451.24 to 11364.2) | 0.93     |
| GLRLM RP                               | 0.87 (0.85 to 0.88)           | 0.87 (0.86 to 0.88)          | 0.71     |

|                         |                              |                                |      |
|-------------------------|------------------------------|--------------------------------|------|
| <b>GLRLM SRE</b>        | 0.9 (0.89 to 0.91)           | 0.9 (0.89 to 0.91)             | 0.63 |
| <b>GLRLM SRHGE</b>      | 1.04E+4 (1.02E+4 to 1.06E+4) | 1.05E+4 (1.02E+4 to 1.05E+4)   | 0.97 |
| <b>GLRLM SRLGE</b>      | 7.7E-5 (7.6E-5 to 7.9E-5)    | 7.7E-5 (7.7E-5 to 8E-5)        | 0.69 |
| <b>GLZLM GLNU</b>       | 104.25 (69.1 to 190.46)      | 132.52 (59.73 to 190.73)       | 0.81 |
| <b>GLZLM HGZE</b>       | 1.14E+4 (1.12E+4 to 1.16E+4) | 1.14E+4 (1.12E+4 to 1.16E+4)   | 0.42 |
| <b>GLZLM LGZE</b>       | 8.8E-5 (8.6E-5 to 8.9E-5)    | 8.8E-5 (8.6E-5 to 9E-5)        | 0.42 |
| <b>GLZLM LZE</b>        | 2573.42 (1176.92 to 6522.26) | 3044.99 (1086.13 to 8368.48)   | 0.95 |
| <b>GLZLM LZHGE</b>      | 3.07E+7 (1.42E+7 to 7.74E+7) | 3.59E+07 (1.3E+07 to 9.72E+07) | 0.98 |
| <b>GLZLM LZLGE</b>      | 0.22 (0.098 to 0.55)         | 0.26 (0.09 to 0.72)            | 0.93 |
| <b>GLZLM SZE</b>        | 0.63 (0.62 to 0.65)          | 0.65 (0.64 to 0.65)            | 0.17 |
| <b>GLZLM SZHGE</b>      | 7232.64 (7009.95 to 7428.23) | 7297.75 (7138.55 to 7441.65)   | 0.53 |
| <b>GLZLM SZLGE</b>      | 5.6E-5 (5.4E-5 to 5.7E-5)    | 5.7E-5 (5.5E-5 to 5.9E-5)      | 0.12 |
| <b>GLZLM ZLNU</b>       | 493.62 (328.08 to 950.03)    | 586.02 (316.99 to 897.54)      | 0.81 |
| <b>GLZLM ZP</b>         | 0.16 (0.14 to 0.17)          | 0.16 (0.13 to 0.21)            | 0.41 |
| <b>NGLDM Busyness</b>   | 0.34 (0.19 to 0.58)          | 0.42 (0.13 to 0.62)            | 1    |
| <b>NGLDM Coarseness</b> | 0.0012 (0.00048 to 0.0016)   | 0.00074 (0.00043 to 0.0022)    | 0.74 |
| <b>NGLDM Contrast</b>   | 0.038 (0.025 to 0.047)       | 0.035 (0.028 to 0.043)         | 0.53 |

*Legend:* **AUC**: area under the curve; **CSH**: cumulative SUV-volume histogram; **GLCM**: gray-level-co-occurrence-matrix; **GLNU**, gray-level nonuniformity; **GLRLM**, gray-level-run-length-matrix; **GLZLM**: gray-level zone-length-matrix; **HGRE**: high-gray-level-emphasis; **HGZE**: high-gray-level-zone-emphasis; **HU**: Hounsfield-Unit; **LGZE**: low-gray-level-zone-emphasis; **LRE**: long-run-emphasis; **LRHGE**: long-run-high-gray-level-emphasis; **LRLGE**: long-run-low-gray-level-emphasis; **LZE**: large-zone-emphasis; **LZHGE**: large-zone-high-gray-level-emphasis; **LZLGE**: large-zone-low-gray-level-emphasis; **NGLDM**: neighboring-gray-level-dependence-matrix; **Q1-2-3**: quartile 1-2-3; **RLNU**: run-length-non-uniformity; **RP**: Run-percentage; **SRHGE**: short-run-high-gray-level-emphasis; **SRLGE**: short-run-low-gray-level-emphasis; **SZHGE**: small-zone-high-gray-level-emphasis; **SZLGE**: small-zone-low-gray-level-emphasis; **SRE**: short-run-emphasis; **Std**: standard deviation; **SZE**: small-zone-emphasis; **SZHGE**: short-zone-high-gray-level-emphasis; **SZLGE**: short-zone-low-gray-level emphasis; **YI**: Youden Index; **ZLNU**: zone-length-non-uniformity; **ZP**: zone-percentage.

Table S2. BRAF gene: values of the 56 texture parameters. No significant parameters were found.

| Texture parameter                      | Median (interquartile range)    |                                 | p    |
|----------------------------------------|---------------------------------|---------------------------------|------|
|                                        | Wild-type BRAF (group 0)        | Mutated BRAF (group 1)          |      |
| CONVENTIONAL HU ExcessKurtosis         | 0.93 (0.49 to 1.58)             | 1.01 (0.029 to 1.26)            | 0.63 |
| CONVENTIONAL HU Kurtosis               | 3.93 (3.49 to 4.58)             | 4.01 (3.03 to 4.26)             | 0.63 |
| CONVENTIONAL HU max                    | 165.38 (151.49 to 178.04)       | 152.67 (143.15 to 176.87)       | 0.32 |
| CONVENTIONAL HU mean                   | 74.73 (63.71 to 81.83)          | 71.6 (64.25 to 80.79)           | 0.79 |
| CONVENTIONAL HU min                    | -66.45 (-97.89 to -41.17)       | -44.73 (-108.24 to -35.37)      | 0.70 |
| CONVENTIONAL HU Q1                     | 59.9 (47.51 to 68.43)           | 57.98 (48.08 to 62.71)          | 0.61 |
| CONVENTIONAL HU Q2                     | 75.98 (65.23 to 84.51)          | 73.45 (64.88 to 82.96)          | 0.77 |
| CONVENTIONAL HU Q3                     | 91.92 (82.42 to 99.82)          | 87.55 (81.09 to 100.46)         | 0.79 |
| CONVENTIONAL HU Skewness               | -0.44 (-0.66 to -0.2)           | -0.52 (-0.62 to -0.28)          | 0.74 |
| CONVENTIONAL HU std                    | 24.73 (22.88 to 27.37)          | 24.53 (22.51 to 28.71)          | 0.90 |
| DISCRETIZED AUC CSH                    | 1079.78 (1068.69 to 1086.82)    | 1076.6 (1069.22 to 1085.76)     | 0.79 |
| DISCRETIZED HISTO Energy [=Uniformity] | 0.12 (0.11 to 0.13)             | 0.12 (0.099 to 0.13)            | 0.74 |
| DISCRETIZED HISTO Entropy log2         | 3.34 (3.2 to 3.47)              | 3.33 (3.21 to 3.56)             | 0.88 |
| DISCRETIZED HISTO Entropy log10        | 1 (0.96 to 1.05)                | 1 (0.97 to 1.07)                | 0.88 |
| DISCRETIZED HU ExcessKurtosis          | 0.88 (0.46 to 1.52)             | 0.98 (0.027 to 1.25)            | 0.65 |
| DISCRETIZED HU Kurtosis                | 3.88 (3.46 to 4.52)             | 3.98 (3.03 to 4.25)             | 0.65 |
| DISCRETIZED HU max                     | 117 (115.5 to 118.5)            | 116 (115 to 118.5)              | 0.60 |
| DISCRETIZED HU mean                    | 107.98 (106.87 to 108.68)       | 107.66 (106.92 to 108.58)       | 0.79 |
| DISCRETIZED HU min                     | 94 (91 to 96.5)                 | 96 (89.25 to 96.75)             | 0.74 |
| DISCRETIZED HU Q1                      | 106 (105 to 107)                | 106 (105.25 to 107)             | 0.84 |
| DISCRETIZED HU Q2                      | 108 (107 to 109)                | 108 (107 to 108.75)             | 0.70 |
| DISCRETIZED HU Q3                      | 110 (109 to 110)                | 109 (109 to 110.5)              | 0.64 |
| DISCRETIZED HU Skewness                | -0.43 (-0.65 to -0.18)          | -0.51 (-0.61 to -0.27)          | 0.72 |
| DISCRETIZED HU std                     | 2.49 (2.31 to 2.75)             | 2.47 (2.27 to 2.89)             | 0.93 |
| GLCM Contrast [=Variance]              | 6.59 (5.79 to 8.02)             | 6.7 (5.72 to 7.37)              | 0.98 |
| GLCM Correlation                       | 0.38 (0.34 to 0.44)             | 0.41 (0.35 to 0.44)             | 0.44 |
| GLCM Dissimilarity                     | 1.94 (1.83 to 2.16)             | 1.99 (1.82 to 2.1)              | 0.98 |
| GLCM Energy [=AngularSecondMoment]     | 0.017 (0.015 to 0.021)          | 0.017 (0.012 to 0.02)           | 0.55 |
| GLCM Entropy log2 [=JointEntropy]      | 6.39 (6.14 to 6.57)             | 6.36 (6.18 to 6.79)             | 0.70 |
| GLCM Entropy log10                     | 1.92 (1.85 to 1.98)             | 1.91 (1.86 to 2.05)             | 0.70 |
| GLCM Homogeneity [=InverseDifference]  | 0.46 (0.44 to 0.48)             | 0.45 (0.44 to 0.48)             | 0.81 |
| GLRLM GLNU                             | 804.89 (470.88 to 1567.22)      | 1400.92 (578.25 to 2265.58)     | 0.61 |
| GLRLM HGRE                             | 11650 (11418 to 11805)          | 11585 (11433 to 11789)          | 0.81 |
| GLRLM LGRE                             | 0.000086 (0.000085 to 0.000088) | 0.000087 (0.000085 to 0.000088) | 0.81 |
| GLRLM LRE                              | 1.53 (1.46 to 1.58)             | 1.54 (1.5 to 1.59)              | 0.88 |
| GLRLM LRHGE                            | 17842 (17175 to 18465)          | 17647 (17603 to 18492)          | 0.93 |
| GLRLM LRLGE                            | 1.3E-4 (1.3E-4 to 1.4E-4)       | 1.3E-4 (1.3E-4 to 1.4E-4)       | 0.57 |

|                         |                              |                              |      |
|-------------------------|------------------------------|------------------------------|------|
| <b>GLRLM RLNU</b>       | 5005 (2926 to 10445)         | 7525 (3662 to 15047)         | 0.59 |
| <b>GLRLM RP</b>         | 0.87 (0.86 to 0.88)          | 0.86 (0.85 to 0.87)          | 0.74 |
| <b>GLRLM SRE</b>        | 0.9 (0.89 to 0.91)           | 0.9 (0.89 to 0.9)            | 0.65 |
| <b>GLRLM SRHGE</b>      | 10491 (10255 to 10620)       | 10318 (10252 to 10515)       | 0.42 |
| <b>GLRLM SRLGE</b>      | 7.7E-5 (7.6E-5 to 7.9E-5)    | 7.7E-5 (7.7E-5 to 7.8E-5)    | 0.90 |
| <b>GLZLM GLNU</b>       | 111.09 (62.84 to 188.52)     | 140.38 (74.81 to 236.44)     | 0.63 |
| <b>GLZLM HGZE</b>       | 11436 (11272 to 11657)       | 11367 (11243 to 11640)       | 0.74 |
| <b>GLZLM LGZE</b>       | 8.8E-5 (8.6E-5 to 8.9E-5)    | 8.8E-5 (8.6E-5 to 8.9E-5)    | 0.74 |
| <b>GLZLM LZE</b>        | 2496 (1056 to 6682)          | 3486 (2045 to 11522)         | 0.51 |
| <b>GLZLM LZHGE</b>      | 2.99E+7 (1.25E+7 to 7.88E+7) | 4.22E+7 (2.38E+7 to 1.36E+7) | 0.53 |
| <b>GLZLM LZLGE</b>      | 0.21 (0.090 to 0.57)         | 0.29 (0.18 to 0.97)          | 0.47 |
| <b>GLZLM SZE</b>        | 0.64 (0.62 to 0.65)          | 0.62 (0.62 to 0.65)          | 0.49 |
| <b>GLZLM SZHGE</b>      | 7297 (7101 to 7449)          | 7179 (6947 to 7318)          | 0.14 |
| <b>GLZLM SZLGE</b>      | 5.6E-5 (5.5E-5 to 5.8E-5)    | 5.5E-5 (5.3E-5 to 5.9E-5)    | 0.51 |
| <b>GLZLM ZLNU</b>       | 495.79 (313.37 to 845)       | 547.07 (344.8 to 1067.06)    | 0.51 |
| <b>GLZLM ZP</b>         | 0.16 (0.14 to 0.2)           | 0.15 (0.12 to 0.16)          | 0.34 |
| <b>NGLDM Busyness</b>   | 0.36 (0.19 to 0.58)          | 0.51 (0.26 to 0.78)          | 0.46 |
| <b>NGLDM Coarseness</b> | 0.00095 (0.00048 to 0.0017)  | 0.0006 (0.00036 to 0.0013)   | 0.63 |
| <b>NGLDM Contrast</b>   | 0.036 (0.026 to 0.043)       | 0.04 (0.027 to 0.047)        | 0.44 |

*Legend:* **AUC:** area under the curve; **CSH:** cumulative SUV-volume histogram; **GLCM:** gray-level-co-occurrence-matrix; **GLNU,** gray-level nonuniformity; **GLRLM,** gray-level-run-length-matrix; **GLZLM:** gray-level zone-length-matrix; **HGRE:** high-gray-level-emphasis; **HGZE:** high-gray-level-zone-emphasis; **HU:** Hounsfield-Unit; **LGZE:** low-gray-level-zone-emphasis; **LRE:** long-run-emphasis; **LRHGE:** long-run-high-gray-level-emphasis; **LRLGE:** long-run-low-gray-level-emphasis; **LZE:** large-zone-emphasis; **LZHGE:** large-zone-high-gray-level-emphasis; **LZLGE:** large-zone-low-gray-level-emphasis; **NGLDM:** neighboring-gray-level-dependence-matrix; **Q1-2-3:** quartile 1-2-3; **RLNU:** run-length-non-uniformity; **RP:** Run-percentage; **SRHGE:** short-run-high-gray-level-emphasis; **SRLGE:** short-run-low-gray-level-emphasis; **SZHGE:** small-zone-high-gray-level-emphasis; **SZLGE:** small-zone-low-gray-level-emphasis; **SRE:** short-run-emphasis; **Std:** standard deviation; **SZE:** small-zone-emphasis; **SZHGE:** short-zone-high-gray-level-emphasis; **SZLGE:** short-zone-low-gray-level emphasis; **YI:** Youden Index; **ZLNU:** zone-length-non-uniformity; **ZP:** zone-percentage.

**Table S3.** NRAS gene: values of the 56 texture parameters. One significant parameter was found. Note: the interquartile range could not be calculated for the mutated NRAS group, as it only comprised three patients.

| Texture parameter                      | Median (interquartile range) |                        | <i>p</i>     |
|----------------------------------------|------------------------------|------------------------|--------------|
|                                        | Wild-type NRAS (group 0)     | Mutated NRAS (group 1) |              |
| CONVENTIONAL HU min                    | −69.15 (−103.6 to −41.17)    | −42.93 (NC)            | 0.19         |
| CONVENTIONAL HU mean                   | 72.43 (63.62 to 81.40)       | 86.60 (NC)             | 0.09         |
| CONVENTIONAL HU std                    | 24.63 (22.88 to 27.75)       | 24.19 (NC)             | 0.49         |
| CONVENTIONAL HU max                    | 164.79 (150.71 to 178.04)    | 149.59 (NC)            | 0.73         |
| CONVENTIONAL HU Q1                     | 59.57 (47.19 to 66.15)       | 73.55 (NC)             | 0.08         |
| CONVENTIONAL HU Q2                     | 73.83 (64.77 to 83.32)       | 88.46 (NC)             | 0.07         |
| CONVENTIONAL HU Q3                     | 87.34 (81.95 to 98.78)       | 100.82 (NC)            | 0.08         |
| CONVENTIONAL HU Skewness               | −0.43 (−0.59 to −0.18)       | −0.69 (NC)             | 0.07         |
| CONVENTIONAL HU Kurtosis               | 3.90 (3.44 to 4.32)          | 4.60 (NC)              | 0.21         |
| CONVENTIONAL HU ExcessKurtosis         | 0.90 (0.44 to 1.32)          | 1.60 (NC)              | 0.21         |
| DISCRETIZED HU min                     | 93.50 (90.50 to 96.50)       | 96 (NC)                | 0.21         |
| DISCRETIZED HU mean                    | 107.74 (106.86 to 108.64)    | 109.16 (NC)            | 0.09         |
| DISCRETIZED HU std                     | 2.48 (2.31 to 2.79)          | 2.43 (NC)              | 0.46         |
| DISCRETIZED HU max                     | 117 (115.50 to 118.50)       | 115 (NC)               | 0.68         |
| DISCRETIZED HU Q1                      | 106 (105 to 107)             | 108 (NC)               | <b>0.049</b> |
| DISCRETIZED HU Q2                      | 108 (107 to 109)             | 109 (NC)               | 0.13         |
| DISCRETIZED HU Q3                      | 109 (109 to 110)             | 111 (NC)               | 0.053        |
| DISCRETIZED HU Skewness                | −0.43 (−0.59 to −0.18)       | −0.68 (NC)             | 0.08         |
| DISCRETIZED HU Kurtosis                | 3.85 (3.43 to 4.28)          | 4.49 (NC)              | 0.22         |
| DISCRETIZED HU ExcessKurtosis          | 0.85 (0.43 to 1.28)          | 1.49 (NC)              | 0.22         |
| DISCRETIZED HISTO Entropy log10        | 1 (0.97 to 1.05)             | 0.98 (NC)              | 0.41         |
| DISCRETIZED HISTO Entropy log2         | 3.34 (3.21 to 3.48)          | 3.27 (NC)              | 0.41         |
| DISCRETIZED HISTO Energy [=Uniformity] | 0.12 (0.11 to 0.13)          | 0.13 (NC)              | 0.26         |
| DISCRETIZED AUC CSH                    | 1077 (1068 to 1086)          | 1091 (NC)              | 0.09         |
| GLCM Homogeneity [=InverseDifference]  | 0.46 (0.44 to 0.47)          | 0.48 (NC)              | 0.54         |
| GLCM Energy [=AngularSecondMoment]     | 0.017 (0.015 to 0.021)       | 0.022 (NC)             | 0.18         |
| GLCM Contrast [=Variance]              | 6.64 (5.87 to 7.88)          | 5.75 (NC)              | 0.6          |
| GLCM Correlation                       | 0.38 (0.34 to 0.45)          | 0.30 (NC)              | 0.18         |
| GLCM Entropy log10                     | 1.92 (1.85 to 1.99)          | 1.83 (NC)              | 0.19         |
| GLCM Entropy log2 [=JointEntropy]      | 6.39 (6.16 to 6.61)          | 6.07 (NC)              | 0.19         |
| GLCM Dissimilarity                     | 1.97 (1.84 to 2.15)          | 1.82 (NC)              | 0.57         |
| GLRLM SRE                              | 0.90 (0.89 to 0.91)          | 0.90 (NC)              | 0.63         |
| GLRLM LRE                              | 1.53 (1.47 to 1.59)          | 1.53 (NC)              | 0.73         |
| GLRLM LGRE                             | 8.6E-5 (8.5E-5 to 8.8E-5)    | 8.4E-5 (NC)            | 0.09         |
| GLRLM HGRE                             | 11605 (11418 to 11794)       | 11908 (NC)             | 0.09         |
| GLRLM SRLGE                            | 7.7E-5 (7.6E-5 to 7.9E-5)    | 7.7E-5 (NC)            | 0.24         |
| GLRLM SRHGE                            | 10462 (10251 to 10602)       | 10702 (NC)             | 0.13         |
| GLRLM LRLGE                            | 1.3E-4 (1.3E-4 to 1.4E-4)    | 1.3E-4 (NC)            | 0.38         |
| GLRLM LRHGE                            | 17742 (17266 to 18648)       | 18235 (NC)             | 0.73         |
| GLRLM GLNU                             | 889.69 (498.56 to 1660.21)   | 469.51 (NC)            | 0.15         |
| GLRLM RLNU                             | 5609 (3221 to 11596)         | 3289 (NC)              | 0.09         |
| GLRLM RP                               | 0.87 (0.86 to 0.88)          | 0.87 (NC)              | 0.66         |
| NGLDM Coarseness                       | 0.86 (0.86 to 0.88)          | 0.0015 (NC)            | 0.14         |
| NGLDM Contrast                         | 0.04 (0.03 to 0.04)          | 0.04 (NC)              | 0.97         |
| NGLDM Busyness                         | 0.39 (0.21 to 0.63)          | 0.17 (NC)              | 0.11         |
| GLZLM SZE                              | 0.64 (0.62 to 0.65)          | 0.64 (NC)              | 0.83         |

|                    |                              |              |      |
|--------------------|------------------------------|--------------|------|
| <b>GLZLM LZE</b>   | 3204 (1110 to 8153)          | 1226 (NC)    | 0.19 |
| <b>GLZLM LGZE</b>  | 8.8E-5 (8.6E-5 to 8.9E-5)    | 8.6E-5 (NC)  | 0.32 |
| <b>GLZLM HGZE</b>  | 11412 (11265 to 11640)       | 11684 (NC)   | 0.32 |
| <b>GLZLM SZLGE</b> | 5.6E-5 (5.4E-5 to 5.8E-5)    | 5.6E-5 (NC)  | 0.93 |
| <b>GLZLM SZHGE</b> | 7250 (7054 to 7406)          | 7434 (NC)    | 0.41 |
| <b>GLZLM LZLGE</b> | 0.27 (0.09 to 0.71)          | 0.10 (NC)    | 0.19 |
| <b>GLZLM LZHGE</b> | 3.79E+7 (1.30E+7 to 9.41E+7) | 1.48E+7 (NC) | 0.19 |
| <b>GLZLM GLNU</b>  | 113.51 (67.20 to 191.10)     | 71.75 (NC)   | 0.13 |
| <b>GLZLM ZLNU</b>  | 508.48 (320.11 to 928.6)     | 357.87 (NC)  | 0.16 |
| <b>GLZLM ZP</b>    | 0.16 (0.13 to 0.19)          | 0.17 (NC)    | 0.22 |

*Legend:* **AUC:** area under the curve; **CSH:** cumulative SUV-volume histogram; **GLCM:** gray-level-co-occurrence-matrix; **GLNU,** gray-level nonuniformity; **GLRLM,** gray-level-run-length-matrix; **GLZLM:** gray-level zone-length-matrix; **HGRE:** high-gray-level-emphasis; **HGZE:** high-gray-level-zone-emphasis; **HU:** Hounsfield-Unit; **LGZE:** low-gray-level-zone-emphasis; **LRE:** long-run-emphasis; **LRHGE:** long-run-high-gray-level-emphasis; **LRLGE:** long-run-low-gray-level-emphasis; **LZE:** large-zone-emphasis; **LZHGE:** large-zone-high-gray-level-emphasis; **LZLGE:** large-zone-low-gray-level-emphasis; **NGLDM:** neighboring-gray-level-dependence-matrix; **Q1-2-3:** quartile 1-2-3; **RLNU:** run-length-non-uniformity; **RP:** Run-percentage; **SRHGE:** short-run-high-gray-level-emphasis; **SRLGE:** short-run-low-gray-level-emphasis; **SZHGE:** small-zone-high-gray-level-emphasis; **SZLGE:** small-zone-low-gray-level-emphasis; **SRE:** short-run-emphasis; **Std:** standard deviation; **SZE:** small-zone-emphasis; **SZHGE:** short-zone-high-gray-level-emphasis; **SZLGE:** short-zone-low-gray-level emphasis; **YI:** Youden Index; **ZLNU:** zone-length-non-uniformity; **ZP:** zone-percentage.

**Table S4.** Microsatellite status: values of the 56 texture parameters. Four significant parameters were found.

| Texture parameter                      | Median (interquartile range) |                            | p            |
|----------------------------------------|------------------------------|----------------------------|--------------|
|                                        | MSS (group 0)                | MSI (group 1)              |              |
| CONVENTIONAL HU min                    | -61.30 (-93.12 to -39.83)    | -76.30 (-212.44 to -43.22) | 0.21         |
| CONVENTIONAL HU mean                   | 74.97 (65 to 82.01)          | 65.11 (58.35 to 81.48)     | 0.2          |
| CONVENTIONAL HU std                    | 24.56 (22.19 to 26.54)       | 27.89 (23.37 to 30.25)     | 0.099        |
| CONVENTIONAL HU max                    | 159.52 (148.75 to 174.51)    | 169.04 (159.19 to 184.83)  | 0.27         |
| CONVENTIONAL HU Q1                     | 60.22 (48.68 to 68.48)       | 47.82 (38.92 to 63.58)     | 0.11         |
| CONVENTIONAL HU Q2                     | 76.19 (66.79 to 85.07)       | 66.23 (57.26 to 83.37)     | 0.17         |
| CONVENTIONAL HU Q3                     | 91.92 (82.76 to 99.95)       | 84 (76.46 to 100.78)       | 0.32         |
| CONVENTIONAL HU Skewness               | -0.45 (-0.63 to -0.22)       | -0.44 (-0.72 to -0.21)     | 0.94         |
| CONVENTIONAL HU Kurtosis               | 3.93 (3.44 to 4.56)          | 4.01 (3.57 to 4.73)        | 0.71         |
| CONVENTIONAL HU ExcessKurtosis         | 0.93 (0.44 to 1.56)          | 1.01 (0.57 to 1.73)        | 0.71         |
| DISCRETIZED HU min                     | 94 (91 to 97)                | 93 (79 to 96)              | 0.18         |
| DISCRETIZED HU mean                    | 108 (107 to 108.7)           | 107.01 (106.33 to 108.65)  | 0.2          |
| DISCRETIZED HU std                     | 2.48 (2.23 to 2.67)          | 2.8 (2.36 to 3.04)         | 0.094        |
| DISCRETIZED HU max                     | 116 (115 to 118)             | 117 (116.5 to 119)         | 0.2          |
| DISCRETIZED HU Q1                      | 106.5 (105 to 107)           | 105 (104.75 to 107)        | 0.14         |
| DISCRETIZED HU Q2                      | 108 (107 to 109)             | 107 (106 to 109)           | 0.24         |
| DISCRETIZED HU Q3                      | 110 (109 to 110)             | 109 (108 to 110.25)        | 0.17         |
| DISCRETIZED HU Skewness                | -0.44 (-0.62 to -0.21)       | -0.44 (-0.7 to -0.21)      | 0.91         |
| DISCRETIZED HU Kurtosis                | 3.88 (3.44 to 4.49)          | 3.98 (3.56 to 4.72)        | 0.71         |
| DISCRETIZED HU ExcessKurtosis          | 0.88 (0.44 to 1.49)          | 0.98 (0.56 to 1.72)        | 0.71         |
| DISCRETIZED HISTO Entropy log10        | 1 (0.96 to 1.03)             | 1.06 (0.97 to 1.09)        | 0.079        |
| DISCRETIZED HISTO Entropy log2         | 3.33 (3.2 to 3.41)           | 3.51 (3.23 to 3.63)        | 0.079        |
| DISCRETIZED HISTO Energy [=Uniformity] | 0.12 (0.11 to 0.13)          | 0.1 (0.093 to 0.13)        | 0.074        |
| DISCRETIZED AUC CSH                    | 1079 (1070 to 1087)          | 1070 (1063 to 1086)        | 0.2          |
| GLCM Homogeneity [=InverseDifference]  | 0.46 (0.44 to 0.48)          | 0.45 (0.43 to 0.48)        | 0.73         |
| GLCM Energy [=AngularSecondMoment]     | 0.018 (0.015 to 0.021)       | 0.013 (0.012 to 0.02)      | 0.084        |
| GLCM Contrast [=Variance]              | 6.59 (5.75 to 7.73)          | 7.59 (5.74 to 8.9)         | 0.52         |
| GLCM Correlation                       | 0.37 (0.34 to 0.44)          | 0.43 (0.38 to 0.52)        | 0.089        |
| GLCM Entropy log10                     | 1.91 (1.85 to 1.96)          | 2.04 (1.85 to 2.06)        | 0.099        |
| GLCM Entropy log2 [=JointEntropy]      | 6.35 (6.16 to 6.5)           | 6.76 (6.15 to 6.86)        | 0.099        |
| GLCM Dissimilarity                     | 1.95 (1.82 to 2.13)          | 2.13 (1.82 to 2.23)        | 0.67         |
| GLRLM SRE                              | 0.9 (0.89 to 0.91)           | 0.89 (0.88 to 0.91)        | 0.53         |
| GLRLM LRE                              | 1.53 (1.46 to 1.56)          | 1.55 (1.44 to 1.67)        | 0.55         |
| GLRLM LGRE                             | 8.6E-5 (8.5E-5 to 8.8E-5)    | 8.8E-5 (8.5E-5 to 8.9E-5)  | 0.21         |
| GLRLM HGRE                             | 11661 (11448 to 11815)       | 11452 (11309 to 11804)     | 0.21         |
| GLRLM SRLGE                            | 7.7E-5 (7.6E-5 to 7.9E-5)    | 7.7E-5 (7.7E-5 to 7.9E-5)  | 0.77         |
| GLRLM SRHGE                            | 10475 (10263 to 10604)       | 10318 (10115 to 10655)     | 0.37         |
| GLRLM LRLGE                            | 1.3E-4 (1.3E-4 to 1.4E-4)    | 1.4E-4 (1.2E-4 to 1.4E-4)  | 0.47         |
| GLRLM LRHGE                            | 17739 (17197 to 18235)       | 17830 (16943 to 19052)     | 0.61         |
| GLRLM GLNU                             | 655 (469 to 1468)            | 1448 (772 to 3213)         | 0.084        |
| GLRLM RLNU                             | 4419 (2811 to 9267)          | 11829 (5918 to 21721)      | <b>0.037</b> |
| GLRLM RP                               | 0.87 (0.86 to 0.88)          | 0.86 (0.84 to 0.88)        | 0.57         |
| NGLDM Coarseness                       | 1.2E-3 (5.4E-4 to 1.7E-3)    | 4.9E-4 (2.8E-4 to 9.3E-4)  | 0.055        |
| NGLDM Contrast                         | 0.036 (0.028 to 0.043)       | 0.03 (0.021 to 0.047)      | 0.52         |
| NGLDM Busyness                         | 0.34 (0.19 to 0.49)          | 0.63 (0.36 to 0.88)        | 0.066        |
| GLZLM SZE                              | 0.64 (0.63 to 0.65)          | 0.62 (0.62 to 0.63)        | 0.062        |
| GLZLM LZE                              | 2407 (1086 to 6361)          | 4790 (1953 to 18584)       | 0.27         |
| GLZLM LGZE                             | 8.8E-5 (8.6E-5 to 8.9E-5)    | 8.9E-5 (8.6E-5 to 8.9E-5)  | 0.42         |

|                    |                              |                              |               |
|--------------------|------------------------------|------------------------------|---------------|
| <b>GLZLM HGZE</b>  | 11458 (11275 to 11668)       | 11355 (11219 to 11639)       | 0.45          |
| <b>GLZLM SZLGE</b> | 5.6E-5 (5.5E-5 to 5.8E-5)    | 5.5E-5 (5.4E-5 to 5.6E-5)    | 0.23          |
| <b>GLZLM SZHGE</b> | 7334 (7114 to 7457)          | 7070 (6937 to 7192)          | <b>0.0081</b> |
| <b>GLZLM LZLGE</b> | 0.2 (0.09 to 0.54)           | 0.42 (0.16 to 1.64)          | 0.27          |
| <b>GLZLM LZHGE</b> | 2.86E+7 (1.30E+7 to 7.59E+7) | 5.41E+7 (2.32E+7 to 2.11E+7) | 0.28          |
| <b>GLZLM GLNU</b>  | 97.39 (62.29 to 177.79)      | 186.42 (133.31 to 290.23)    | <b>0.025</b>  |
| <b>GLZLM ZLNU</b>  | 378 (304 to 763)             | 920 (546 to 1378)            | <b>0.011</b>  |
| <b>GLZLM ZP</b>    | 0.16 (0.14 to 0.19)          | 0.15 (0.12 to 0.2)           | 0.3           |

*Legend:* **AUC:** area under the curve; **CSH:** cumulative SUV-volume histogram; **GLCM:** gray-level-co-occurrence-matrix; **GLNU,** gray-level nonuniformity; **GLRLM,** gray-level-run-length-matrix; **GLZLM:** gray-level zone-length-matrix; **HGRE:** high-gray-level-emphasis; **HGZE:** high-gray-level-zone-emphasis; **HU:** Hounsfield-Unit; **LGZE:** low-gray-level-zone-emphasis; **LRE:** long-run-emphasis; **LRHGE:** long-run-high-gray-level-emphasis; **LRLGE:** long-run-low-gray-level-emphasis; **LZE:** large-zone-emphasis; **LZHGE:** large-zone-high-gray-level-emphasis; **LZLGE:** large-zone-low-gray-level-emphasis; **NGLDM:** neighboring-gray-level-dependence-matrix; **Q1-2-3:** quartile 1-2-3; **RLNU:** run-length-non-uniformity; **RP:** Run-percentage; **SRHGE:** short-run-high-gray-level-emphasis; **SRLGE:** short-run-low-gray-level-emphasis; **SZHGE:** small-zone-high-gray-level-emphasis; **SZLGE:** small-zone-low-gray-level-emphasis; **SRE:** short-run-emphasis; **Std:** standard deviation; **SZE:** small-zone-emphasis; **SZHGE:** short-zone-high-gray-level-emphasis; **SZLGE:** short-zone-low-gray-level emphasis; **YI:** Youden Index; **ZLNU:** zone-length-non-uniformity; **ZP:** zone-percentage.
